# Supplementary material
Source: PubMed Central journal article supplement (PMC7116361)
Supplement: EMS103698-supplement-Supplementary_appendix_1.pdf [file EMS103698-supplement-Supplementary_appendix_1.pdf]

# THE LANCET

## Supplementary appendix

This appendix formed part of the original submission and has been peer reviewed.  
We post it as supplied by the authors.

Supplement to: GBD 2019 Viewpoint Collaborators. Five insights from the Global Burden of Disease Study 2019. *Lancet* 2020; **396**: 1135–59.

## Appendix 1: author contributions for “Five insights from the Global Burden of Disease Study 2019”

### Authors’ Contributions

#### Managing the estimation process

Christopher J L Murray, Ashkan Afshin, Tahiya Alam, Charlie Ashbaugh, Celine Barthelemy, Molly Biehl, Michael Brauer, Kelly Compton, Elizabeth Cromwell, Lalit Dandona, Amanda Deen, Mae Dirac, Kara Estep, Alize Ferrai, Nancy Fullman, Christina Fitzmaurice, Lisa Force, Emmanuela Gakidou, Peter Gething, Erin Hamilton, Spencer James, Nicholas Kassebaum, Hmwe Kyu, Alan D Lopez, Ashley Marks, Awoke Misganaw, Ali Mokdad, Meghan Mooney, Jonathan Mosser, Erin Mullany, Mohsen Naghavi, Molly R Nixon, Puja Rao, Greg Roth, Katya Shackelford, Stein Emil Vollset, Theo Vos, Haidong Wang, Harvey Whiteford, Eve Wool, and Stephen S Lim.

#### Writing the first draft of the manuscript

Christopher J L Murray, Samantha Larson, Alan D Lopez, Alexandria Watson, Theo Vos, and Stephen S Lim.

#### Providing data or critical feedback on data sources

Christopher J L Murray, Cristiana Abbafati, Mohammad Abbasi, Bayisa Abdissa, Parisa Abedi, Hassan Abolhassani, Michael RM Abrigo, Abdelrahman Ibrahim Abushouk, Ilana Ackerman, Oladimeji Adebayo, Jaimie Adelson, Olatunji Adetokunboh, Mohsen Afarideh, Gina Agarwal, Tauseef Ahmad, Muktar Ahmed, Budi Aji, Tomi Akinyemiju, Fares Alahdab, Khurshid Alam, Biresaw Alemu, Yihun Mulugeta Alemu, Muhammad Ali, Saqib Ali, Syed Aljunid, François Alla, Peter Allebeck, Amir Almasi-Hashiani, Nelson Alvis-Guzman, Azmeraw T Amare, Saeed Amini, Tudorel Andrei, Fereshteh Ansari, Davood Anvari, Jalal Arabloo, Morteza Arab-Zozani, Johan Ärnlöv, Floriane Ausloos, Marcel Ausloos, Beatriz Paulina Ayala Quintanilla, Samad Azari, Zelalem Nigussie Azene, Mohan Bairwa, Ahmed Bali, Maciej Banach, Palash Chandra Banik, Sanjay Basu, Vo Bay, Ettore Beghi, Adam Berman, Akshaya Srikanth Bhagavathula, Antonio Biondi, Mahdi Bohluli, Archith Bolor, Michael Brauer, Gabrielle Britton, Traolach Brughna, Sharath Burugina Nagaraja, Reinhard Busse, Luis Cámara, Julio Cesar Campuzano Rincon, Josip Car, Juan Jesus Carrero, Deborah Carvalho Malta, Joao Mauricio Castaldelli-Maia, Franz Castro, Ferrán Catalá-López, Fiona Charlson, Vijay Kumar Chattu, Nicolas Cherbuin, Dinh-Toi Chu, Massimo Cirillo, Aaron Cohen, Vera M Costa, Ewerton Cousin, Richard Cowden, Marita Cross, Giovanni Damiani, Lalit Dandona, Rakhi Dandona, Aso Darwesh, Rajat Das Gupta, José Das Neves, Adrian Davis, Nikolaos Dervenis, Rupak Desai, Govinda Dhungana, Mostafa Dianatinasab, Christiane Dolecek, Fariba Dorostkar, Leila Doshmangir, Tim Driscoll, Bruce Duncan, Arielle Eagan, David Edvardsson, Maysaa El Sayed Zaki, Islam Elgendy, Iqbal Elyazar, Mohammad Hassan Emamian, Alireza Esteghamati, Sadaf Esteghamati, Andre Faro, Farshad Farzadfar, Valery Feigin, Seyed-Mohammad Fereshtehnejad, Alize Ferrari, Irina Filip, Morenike Oluwatoyin Folayan, Artem Fomenkov, Richard Franklin, Takeshi Fukumoto, Mohamed Gad, Abhay Gaidhane, Emmanuela Gakidou, Ketema Bizuwork Gebremedhin, Leake Gebremeskel, Hailay Gesesew, Mansour Ghafourifard, Farhad Ghamari, Ahmad Ghashghaee, Giorgia Giussani, Myron Anthony Godinho, Bárbara Goulart, Ayman Grada, Felix Greaves, Nachiket Gudi, Nima Hafezi-Nejad, Arvin Haj-Mirzaian, Brian Hall, Chieh Han, Josep Maria Haro, Soheil Hassanipour, Hadi Hassankhani,

Claudiu Herteliu, Hung Chak Ho, Michael Hole, Praveen Hoogar, Mehdi Hosseinzadhe, Mowafa Househ , Guoqing Hu, Usman Iqbal, Chidozie Declan Iwu, Deepa Jahagirdar, Mihajlo Jakovljevic, Tahereh Javaheri, Ahamarshan Jayaraman Nagarajan, John Ji, Catherine Johnson, Jost B Jonas, Mikk Jürisson, Zubair Kabir, Leila R Kalankesh, André Karch, Salah Eddin Karimi, Ayele Semachew Kasa, Nicholas J Kassebaum, Gbenga Kayode, Nauman Khalid, Mohammad Khammarnia, Ejaz Khan, Maseer Khan, Khaled Khatab, Mahalaqua Nazli Khatib, Abdullah Khoja, Jagdish Khubchandani, Neda Kianipour, Christian Kieling, Yun Jin Kim, Adnan Kisa, Sezer Kisa, Hamidreza Komaki, Soewarta Kosen, Kewal Krishan, G Anil Kumar, Manasi Kumar, Dian Kusuma, Dharmesh Lal, Huong Lan Nguyen, Savita Lasrado, Janet Leasher, Janni Leung, Lee-Ling Lim, Xuefeng Liu, Stefan Lorkowski, Rafael Lozano, Alton Lu, Reza Malekzadeh, Abdullah Mamun, Borhan Mansouri, Mohammad Ali Mansournia, Ana Maria Mantilla Herrera, Francisco Rogerlândio Martins-Melo, Benjamin Massenburg, Manu Mathur, Colm Mcalinden, Addisu Melese, Walter Mendoza, Ritesh G Menezes, Endalkachew Worku Mengesha, Bartosz Miazgowski, Edward Mills, George Milne, Andreea Mirica, Erkin Mirrakhimov, Maryam Mirzaei, Babak Moazen, Masoud Moghadaszadeh, Dara Mohammad, Naser Mohammad Gholi Mezerji, Abdollah Mohammadian-Hafshejani, Shafiu Mohammed, Farnam Mohebi, Ali Mokdad, Mariam Molokhia, Lorenzo Monasta, Ghobad Moradi, Masoud Moradi, Maziar Moradi-Lakeh, Joana Morgado-Da-Costa, Ulrich Mueller, Erin Mullany, Kamarul Imran Musa, Mohsen Naghavi, Seyed Sina Naghibi Irvani, Mukhammad David Naimzada, Luigi Naldi, Javad Nazari, Ionut Negoii, Ruxandra Irina Negoii, Josephine Ngunjiri, Emma Nichols, Rajan Nikbakhsh, Shuhei Nomura, Jean Jacques Noubiap, Felix Ogbo, Andrew T Olagunju, Bolajoko Olusanya, Jacob Olusanya, Kanyin Ong, Obinna Onwujekwe, Alberto Ortiz, Adrian Oțoiu, Nikita Otstavnov, Stanislav Otstavnov, Mahesh P A, Jagdish Rao Padubidri, Smita Pakhale, Keyvan Pakshir, Raffaele Palladino, Songhomitra Panda-Jonas, Mona Pathak, Veincent Christian Pepito, Alexandre Pereira, Jeevan Pereira, Julia Pescarini, Marina Pinheiro, Maarten Postma, Hadi Pourjafar, Narayan Prasad, Elisabetta Pupillo, Hai Quang Pham, Zahiruddin Quazi Syed, Amir Radfar, Mohammad Hifz Ur Rahman, Kiana Ramezanzadeh, Chhabi Lal Ranabhat, Sowmya J Rao, David L Rawaf, Salman Rawaf, Lal Rawal, Reza Rawassizadeh, Lemma Regassa, Marissa Reitsma, Vishnu Renjith, Andre Renzaho, Nima Rezaei, Phoebe-Anne Rhinehart, Seyed Mohammed Riahi, Antonio Luiz Ribeiro, Jennifer Rickard, Leonardo Roeber, Luca Ronfani, Enrico Rubagotti, Godfrey Rwegerera, Siamak Sabour, Basema Saddik, ProfEhsan Sadeghi, S Mohammad Sajadi, Hosni Salem, Marwa Salem, Inbal Salz, Abdallah M Samy, Damian Santomauro, Milena Santric-Milicevic, Benn Sartorius, Arash Sarveazad, Brijesh Sathian, Maria Inês Schmidt, David C Schwebel, Sadaf Sepanlou, Feng Sha, Omid Shafaat, Amira Shaheen, Masood Ali Shaikh, Morteza Shamsizadeh, Sheikh Mohammed Shariful Islam, Maral Shayesteh Bonyan, B Suresh Shetty, Jae Il Shin, Biagio Simonetti, Ambrish Singh, Jasvinder Singh, Valentin Skryabin, Karen Sliwa, Amin Soheili, Joan B Soriano, Chandrashekhar T Sreeramareddy, Mark Stokes, Agus Sudaryanto, Dillon Sylte, Rafael Tabarés-Seisdedos, Amir Taherkhani, Zarfshan Tahir, Animut Tagele Tamiru, Nihal Thomas, Giang Thu Vu, Giang Thu Vu, Maria Titova, Mathilde Touvier, Marcos Roberto Tovani-Palone, Ravensara S Travillian, Riaz Uddin, Irfan Ullah, Bhaskaran Unnikrishnan, Era Upadhyay, Marco Vacante, Pascual Valdez, Alessandro Valli, Tommi Vasankari, Yasser Vasseghian, Narayanaswamy Venketasubramanian, Vasiliy Vlassov, Theo Vos, Yasir Waheed, Robert Weintraub, Jordan Weiss, Ronny Westerman, Taweewat Wiangkham, Bogdan Wojtyniak, Sarah Wulf Hanson, Yang Xie, Sanni Yaya, Jamal Yearwood, Naohiro Yonemoto, Seok-Jun Yoon, Mustafa Younis, Syedsaoud Zaidi, Alireza Zangeneh, Zhi-Jiang Zhang, Xiu-Ju Zhao, Arash Ziapour, Stephanie R M Zimsen, and Stephen S Lim.

### Developing methods or computational machinery

Christopher J L Murray, Jaimie Adelson, Muktar Ahmed, Saeed Amini, Davood Anvari, Aleksandr Aravkin, Samad Azari, Michael Brauer, Aleksey Breusov, Paul Briant, Kate Causey, Kelly Cercy, Aaron Cohen, Kelly Compton, Rajat Das Gupta, Mostafa Dianatinasab, Alireza Didarloo, Ilse Dippenaar, Matthew Doxey, Alize Ferrari, Abhay Gaidhane, Emmanuela Gakidou, William Gardner, Peter Gething, Farhad Ghamari, Ahmad Ghashghaee, Lydia Haile, Chieh Han, Nathaniel Henry, Mowafa Househ, Deepa Jahagirdar, Catherine Johnson, Nicholas J Kassebaum, Mohammad Khammarnia, Mahalaqua Nazli Khatib, Neda Kianipour, Adnan Kisa, Sezer Kisa, Alton Lu, Borhan Mansouri, Masoud Moghadaszadeh, Abdollah Mohammadian-Hafshejani, Ali Mokdad, Mohsen Naghavi, Javad Nazari, Emma Nichols, Rajan Nikbakhsh, Mona Pathak, Zahiruddin Quazi Syed, Chhabi Lal Ranabhat, Marissa Reitsma, Phoebe-Anne Rhinehart, Seyed Mohammed Riahi, Enrico Rubagotti, Susan Fred Rumisha, Abdallah M Samy, Damian Santomauro, Fablina Sharara, Maral Shayesteh Bonyan, Amin Soheili, Jeffrey Stanaway, Dillon Sylte, Yasser Vasseghian, Theo Vos, Ronny Westerman, Lauren Wilner, Biruk Wogayehu, Sarah Wulf Hanson, Vahid Yazdi-Feyzabadi, Jamal Yearwood, Seok-Jun Yoon, Syed Saoud Zaidi, Mikhail Zastrozhin, Peng Zheng, Arash Ziapour, and Stephen S Lim.

### Providing critical feedback on methods or results

Christopher J L Murray, Cristiana Abbafati, Kaja Abbas, Foad Abd-Allah, Bayisa Abdissa, Aidin Abedi, Hassan Abolhassani, Victor Aboyans, Lucas Guimarães Abreu, Michael R, M, Abrigo, Eman Abu-Gharbieh, Abdulaziz Abuhaimed, Abdelrahman Ibrahim Abushouk, Ilana Ackerman, Maryam Adabi, Abdu A Adamu, Oladimeji Adebayo, Olatunji Adetokunboh, Mohsen Afarideh, Gina Agarwal, Anurag Agrawal, Tauseef Ahmad, Keivan Ahmadi, Mehdi Ahmadi, Muktar Ahmed, Budi Aji, Tomi Akinyemiju, Fares Alahdab, Khurshid Alam, Fahad Alanezi, Turki Alanzi, Biresaw Alemu, Khalid Alhabib, Muhammad Ali, Saqib Ali, Gianfranco Alicandro, Vahid Alipour, Syed Aljunid, Amir Almasi-Hashiani, Hesham Al-Mekhlafi, Abdulaziz M Almulhim, Jordi Alonso, Rajaa Al-Raddadi, Khalid Altirkawi, Nelson Alvis-Guzman, Azmeraw T, Amare, Saeed Amini, Arianna Maeveer Amit, Dickson Amugsi, Tudorel Andrei, Mohd Anisul, Fereshteh Ansari, Alireza Ansari-Moghaddam, Davood Anvari, Seth Christopher Yaw Appiah, Jalal Arabloo, Morteza Arab-Zozani, Aseb Arba, Timur Aripov, Johan Ärnlöv, Oluwaseyi Olalekan Arowosegbe, Charlie Ashbaugh, Floriane Ausloos, Marcel Ausloos, Beatriz Paulina Ayala Quintanilla, Getinet Ayano, Martin Ayanore, Samad Azari, Zelalem Nigussie Azene, Ebrahim Babae, Alaa Badawi, Ashish Badiye, Mojtaba Bagherzadeh, Mohan Bairwa, Ahad Bakhtiari, Shankar Bakkannavar, Arun Balachandran, Ahmed Bali, Maciej Banach, Srikanta Banerjee, Palash Chandra Banik, Adhanom Gebreegziabher Baraki, Suzanne Barker-Collo, Huda Basaleem, Sanjay Basu, Bernhard Baune, Vo Bay, Mohsen Bayati, Darshan Bb, Neeraj Bedi, Ettore Beghi, Michelle Bell, Isabela Bensenor, Kidanemariam Berhe, Adam Berman, Akshaya Srikanth Bhagavathula, Neeraj Bhala, Pankaj Bhardwaj, Kritika Bhattacharyya, Suraj Bhattarai, Zulfiqar Bhutta, Ali Bijani, Antonio Biondi, Henok Biresaw, Mahdi Bohluli, Srinivasa Rao Bolla, Archith Boloor, Dipan Bose, Soufiane Boufous, Oliver Brady, Dejana Braithwaite, Michael Brauer, Nicholas Breitborde, Hermann Brenner, Aleksey Breusov, Gabrielle Britton, Traolach Brugha, Sharath Burugina Nagaraja, Reinhard Busse, Zahid Butt, Alessandra C Goulart, Florentino Luciano Caetano Dos Santos, Luis Cámera, Ismael Campos-Nonato, Rosario Cárdenas, Deborah Carvalho Malta, Joao Mauricio Castaldelli-Maia, Franz Castro, Ferrán Catalá-López, Christopher Cederroth, Ester Cerin, Joht Singh Chandan, Jung-Chen Chang, Vijay Kumar Chattu, Sarika Chaturvedi, Nicolas Cherbuin, Ken Chin, Yilma Chisha, Daniel Cho, Jee-Young Choi, Dinh-Toi Chu, Michael Chung, Sheng-Chia Chung, Flavia Cicuttini, Beniamino Cislighi, Aaron Cohen, Vera M Costa, Ewerton Cousin, Richard Cowden, Marita Cross, Steven Cummins, Haijiang Dai, Hancheng Dai, Giovanni Damiani, Lalit Dandona, Rakhi Dandona, Parnaz Daneshpajouhnejad, Aso

Darwesh, Jai Das, Rajat Das Gupta, José Das Neves, Adrian Davis, Diego De Leo, Edgar Denova-Gutierrez, Kebede Deribe, Nikolaos Dervenis, Rupak Desai, Keshab Deuba, Mostafa Dianatinasab, Martin Dichgans, Alireza Didarloo, Christiane Dolecek, Fariba Dorostkar, Chirag Doshi, Pratik Doshi, Leila Doshmangir, Tim Driscoll, Bruce Duncan, Arielle Eagan, Hedyeh Ebrahimi, Mohammad Ebrahimi Kalan, David Edvardsson, Joshua Ehrlich, Maysaa El Sayed Zaki, Islam Elgendy, Iqbal Elyazar, Mohammad Hassan Emamian, Babak Eshrati, Sharareh Eskandarieh, Jessica Fanzo, Andre Faro, Farshad Farzadfar, Nazir Fattahi, Valery Feigin, Seyed-Mohammad Fereshtehnejad, Pietro Ferrara, Alize Ferrari, Irina Filip, Florian Fischer, James Fisher, Nataliya Foigt, Morenike Oluwatoyin Folayan, Artem Fomenkov, Masoud Foroutan, Richard Franklin, Marisa Freitas, Takeshi Fukumoto, Mohamed Gad, Abhay Gaidhane, Emmanuela Gakidou, Temesgen Gebeyehu, Freweini Gebrearegay, Ketema Bizuwork Gebremedhin, Leake Gebremeskel, Begashaw Melaku Gebresillassie, Hailay Gesesew, Kebede Embaye Gezae, Fatemeh Ghaffarifar, Mansour Ghafourifard, Ahmad Ghashghaee, Paramjit Gill, Giorgia Giussani, Yordanos Gizachew, Elena Gnedovskaya, Myron Anthony Godinho, Mahaveer Golechha, Philimon Gona, Sameer Gopalani, Bárbara Goulart, Ayman Grada, Felix Greaves, Nachiket Gudi, Yuming Guo, Rahul Gupta, Rajeev Gupta, Subodh Sharan Gupta, Nima Hafezi-Nejad, Brian Hall, Josep Maria Haro, Abdiwahab Hashi, Soheil Hassanipour, Hadi Hassankhani, Rasmus Havmoeller, Simon Hay, Andualem Henok, Nathaniel Henry, Claudiu Herteliu, Fatemeh Heydarpour, Hung Chak Ho, Michael Hole, Ramesh Holla, Praveen Hoogar, Kathleen Hopf, Naznin Hossain , Seyed Ahmad Hosseini, Mehdi Hosseinzadhe, Mihaela Hostiuc, Sorin Hostiuc, Mowafa Househ , Guoqing Hu, Tanvir Huda, Ayesha Humayun, Bing-Fang Hwang, Ivo Iavicoli, Charles Ibeneme, Segun Emmanuel Ibitoye, Olayinka Ilesanmi, Irena Ilic, Milena Ilic, Leeberk Inbaraj, Usman Iqbal, M Mofizul Islam, Chidozie Declan Iwu, Jalil Jaafari, Mihajlo Jakovljevic, Amir Jalali, Farzad Jalilian , Manthan Janodia, Tahereh Javaheri, Ahamarshan Jayaraman Nagarajan, Ensiyeh Jenabi, Ravi Prakash Jha, Vivekanand Jha, John Ji, Catherine Johnson, Jost B Jonas, Mikk Jürisson, Zubair Kabir, Rizwan Kalani, Leila R Kalankesh, Rohollah Kalhor, Tanuj Kanchan, Neeti Kapoor, Behzad Karami Matin, André Karch, Salah Eddin Karimi, Ayele Semachew Kasa, Nicholas J Kassebaum, Gbenga Kayode, Ali Kazemi Karyani, Nauman Khalid, Mohammad Khammarnia, Ejaz Khan, Maseer Khan, Khaled Khatab, Mona Khater, Mahalaqua Nazli Khatib, Abdullah Khoja, Neda Kianipour, Christian Kieling, Yohannes Kinfu, Adnan Kisa, Sezer Kisa, Niranjana Kisson, Mika Kivimaki, David Koh, Hamidreza Komaki, Jacek Kopec, Anirudh Kotlo, Ai Koyanagi, Kewal Krishan, G Anil Kumar, Manasi Kumar, Nithin Kumar, Dian Kusuma, Carlo La Vecchia, Dharmesh Lal, Tea Lallukka, Qing Lan, Huong Lan Nguyen, Savita Lasrado, Paolo Lauriola, Lisiane Leal, Shaun Lee, Matilde Leonardi, Janni Leung, Bingyu Li, Shanshan Li, Lee-Ling Lim, Ro-Ting Lin, Stefan Listl, Xuefeng Liu, Yang Liu, Giancarlo Logroscino, Alan D Lopez, Stefan Lorkowski, Alton Lu, Daiane Machado, Phetole Mahasha, Morteza Mahmoudi, Azeem Majeed, Afshin Maleki, Shokofeh Maleki, Reza Malekzadeh, Abdullah Mamun, Borhan Mansouri, Mohammad Ali Mansournia, Santi Martini, Francisco Rogerlândio Martins-Melo, Manu Mathur, Pallab K Maulik, Colm Mcalinden, Martin Mckee, Kala M, Mehta, Addisu Melese, Ziad Memish, Walter Mendoza, Ritesh G, Menezes, Endalkachew Worku Mengesha, Atte Meretoja, Irmina Maria Michalek, Edward Mills, George Milne, Mohammad Miri, Andreea Mirica, Erkin Mirrakhimov, Hamed Mirzaei, Maryam Mirzaei, Mehdi Mirzaei-Alavijeh, Babak Moazen, Masoud Moghadaszadeh, Osama Mohamad, Dara Mohammad, Yousef Mohammad, Naser Mohammad Gholi Mezerji, Abdollah Mohammadian-Hafshejani, Shafiu Mohammed, Farnam Mohebi, Ali Mokdad, Mariam Molokhia, Ghobad Moradi, Maziar Moradi-Lakeh, Rahmatollah Moradzadeh, Lidia Morawska, Joana Morgado-Da-Costa, Jonathan Mosser, Amin Mousavi Khaneghah, Ulrich Mueller, Erin Mullany, Kamarul Imran Musa, Mehdi Naderi, Mohsen Naghavi, Seyed Sina Naghibi Irvani, Behshad Naghshtabrizi, Mukhammad David Naimzada, Farid Najafi, Vinod C Nayak, Javad Nazari, Rawlance

Ndejjo, Ionut Negoi, Ruxandra Irina Negoi, Georges Nguetack-Tsague, Josephine Ngunjiri, Emma Nichols, Yeshambel Nigatu, Rajan Nikbakhsh, Molly Nixon, Chukwudi Nnaji, Shuhei Nomura, Jean Jacques Noubiap, Christoph Nowak, Elaine Nsoesie, Felix Ogbo, Onome Oghenetega, Andrew T, Olagunju, Bolajoko Olusanya, Jacob Olusanya, Muktar Omer, Kanyin Ong, Sokking Ong, Obinna Onwujekwe, Eyal Oren, Alberto Ortiz, Samuel Ostroff, Adrian Oțoiu, Nikita Otstavnov, Stanislav Otstavnov, Mayowa Owolabi, Mahesh P A, Jagadish Rao Padubidri, Smita Pakhale, Raffaele Palladino, Adrian Pana, Songhomitra Panda-Jonas, Mona Pathak, Hamidreza Pazoki Toroudi, Amy Peden, Veincent Christian Pepito, Emmanuel Peprah, Alexandre Pereira, Jeevan Pereira, Julia Pescarini, Michael R Phillips, Marina Pinheiro, Meghdad Pirsaeheb , Farhad Pishgar, Constance Pond, Maarten Postma, Faheem Hyder Pottoo, Hadi Pourjafar, Farshad Pourmalek, Sergio Prada, Dimas Ria Angga Pribadi, Elisabetta Pupillo, Hai Quang Pham, Zahiruddin Quazi Syed, Mohammad Rabiee, Navid Rabiee, Amir Radfar, Ata Rafiee, Alberto Raggi, Mohammad Hifz Ur Rahman, Muhammad Aziz Rahman, Chhabi Lal Ranabhat, Sowmya J, Rao, Prateek Rastogi, David L Rawaf, Salman Rawaf, Lal Rawal, Reza Rawassizadeh, Ramu Rawat, Lemma Regassa, Marissa Reitsma, Vishnu Renjith, Andre Renzaho, Serge Resnikoff, Nima Rezaei, Mohammad Sadegh Rezai, Aziz Rezapour, Phoebe-Anne Rhinehart, Seyed Mohammed Riahi, Antonio Luiz Ribeiro, Daniel Cury Ribeiro, Jennifer Rickard, Leonardo Roever, Michele Romoli, Luca Ronfani, Gholamreza Roshandel, Enrico Rubagotti, Godfrey Rwegerera, Seyedmohammad Saadatagah, Siamak Sabour, Perminder Sachdev, Basema Saddik, Prof, Ehsan Sadeghi, Biniyam Sahiledengle, Mohammad Ali Sahraian, S, Mohammad Sajadi, Hosni Salem, Marwa Salem, Hamideh Salimzadeh, Joshua A Salomon, Inbal Salz, Hossein Samadi Kafil, Abdallah M, Samy, Juan Sanabria, Damian Santomauro, Milena Santric-Milicevic, Sivan Saraswathy, Nizal Sarrafzadegan, Benn Sartorius, Arash Sarveazad, Brijesh Sathian, Thirunavukkarasu Sathish, Davide Sattin, Lauren Schaeffer, Silvia Schiavolin, Maria Inês Schmidt, Aletta Schutte, David C Schwebel, Falk Schwendicke, Sadaf Sepanlou, Feng Sha, Omid Shafaat, Saeed Shahabi, Amira Shaheen, Masood Ali Shaikh, Mehran Shams-Beyranvand, Kiomars Sharafi, Sheikh Mohammed Shariful Islam, Maral Shayesteh Bonyan, Mika Shigematsu, Jae Il Shin, Min-Jeong Shin, Rahman Shiri, Km Shivakumar Shivakumar Km, Mark Shrimme, Kerem Shuval, Diego Augusto Santos Silva, Biagio Simonetti, Ambrish Singh, Jasvinder Singh, Pushpendra Singh, Dharendra Narain Sinha, Valentin Skryabin, Karen Sliwa, Emma Smith, Shahin Soltani, Oluwaseyi Dolapo Somefun, Reed Sorensen, Joan B Soriano, Muluken Sorrie, Chandrashekhar T Sreeramareddy, Simona Cătălina Ștefan, Mark Stokes, Saverio Stranges, Agus Sudaryanto, Muawiyah Babale Sufiyan, Rizwan Suliankatchi Abdulkader, Gerhard Sulo, Dillon Sylte, Rafael Tabarés-Seiseddos, Santosh Tadakamadla, Zarfshan Tahir, Animut Tagele Tamiru, Md Tareque, Yonas Getaye Tefera, Fissaha Tekulu, Mohamad-Hani Temsah, Bhaskar Thakur, Kavumpurathu Thankappan, Rekha Thapar, Nihal Thomas, Giang Thu Vu, Giang Thu Vu, Maria Titova, Marcello Tonelli, Mathilde Touvier, Marcos Roberto Tovani-Palone, Ravensara S Travillian, Riaz Uddin, Irfan Ullah, Bhaskaran Unnikrishnan, Era Upadhyay, Marco Vacante, Pascual Valdez, Alessandro Valli, Yasser Vasseghian, Narayanaswamy Venketasubramanian, Francesco S Violante, Stein Emil Vollset, Theo Vos, Yasir Waheed, Richard Wamai, Haidong Wang, Yanzhong Wang, Yuan-Pang Wang, Jingkai Wei, Robert Weintraub, Jordan Weiss, Ronny Westerman, Taweewat Wiangkham, Nuwan Darshana Wickramasinghe, Biruk Wogayehu, Bogdan Wojtyniak, Etsay Woldu, Charles Wolfe, Ai-Min Wu, Chenkai Wu, Sarah Wulf Hanson, Yang Xie, Sanni Yaya, Vahid Yazdi-Feyzabadi, Paul Yip, Naohiro Yonemoto, Seok-Jun Yoon, Mustafa Younis, Theodore Younker, Taraneh Yousefinezhadi, Chuanhua Yu, Deniz Yuce, Hasan Yusefzadeh, Syedsaoud Zaidi, Sojib Bin Zaman, Maryam Zamanian, Alireza Zangeneh, Mikhail Zastrozhin, Kaleab Alemayehu Zewdie, Yunquan Zhang, Bistra Zheleva, Cong Zhu, Arash Ziapour, and Stephen S Lim.

## Drafting the work or revising is critically for important intellectual content

Christopher J L Murray, Cristiana Abbafati, Kaja Abbas, Mohsen Abbasi-Kangevari, Foad Abd-Allah, Aidin Abedi, Hassan Abolhassani, Lucas Guimarães Abreu, Eman Abu-Gharbieh, Abdulaziz Abuhaimed, Abdelrahman Ibrahim Abushouk, Abdu A Adamu, Oladimeji Adebayo, Olatunji Adetokunboh, Gina Agarwal, Muktar Ahmed, Tomi Akinyemiju, Blessing Akombi, Fares Alahdab, Khurshid Alam, Khalid Alhabib, Muhammad Ali, Saqib Ali, Gianfranco Alicandro, Peter Allebeck, Majid Almadi, Amir Almasi-Hashiani, Hesham Al-Mekhlafi, Nelson Alvis-Guzman, Azmeraw T Amare, Saeed Amini, Dickson Amugsi, Deanna Anderlini, Mina Anjomshoa, Carl Abelardo Antonio, Seth Christopher Yaw Appiah, Jalal Arabloo, Morteza Arab-Zozani, Timur Aripov, Johan Ärnlov, Malke Asaad, Mehran Asadi-Aliabadi, Ali Asadi-Pooya, Maha Atout, Floriane Ausloos, Marcel Ausloos, Beatriz Paulina Ayala Quintanilla, Martin Ayanore, Zelalem Nigussie Azene , Alaa Badawi, Ashish Badiye, Mojtaba Bagherzadeh, Mohan Bairwa, Shankar Bakkannavar, Arun Balachandran, Ahmed Bali, Maciej Banach, Srikanta Banerjee, Palash Chandra Banik, Suzanne Barker-Collo, Sanjay Basu, Bernhard Baune, Vo Bay, Darshan Bb, Neeraj Bedi, Ettore Beghi, Michelle Bell, Isabela Bensenor, Kidanemariam Berhe, Adam Berman, Akshaya Srikanth Bhagavathula, Neeraj Bhala, Kritika Bhattacharyya, Boris Bikbov, Antonio Biondi, Henok Biresaw, Catherine Bisignano, Raaj Kishore Biswas, Tone Bjørge, Mahdi Bohluli, Soufiane Boufous, Oliver Brady, Dejana Braithwaite, Michael Brauer, Nicholas Breitborde, Hermann Brenner, Andrew Briggs, Gabrielle Britton, Traolach Brugha, Sharath Burugina Nagaraja, Florentino Luciano Caetano Dos Santos, Ismael Campos-Nonato, Josip Car, Giulia Carreras, Juan Jesus Carrero, Felix Carvalho, Deborah Carvalho Malta, Joao Mauricio Castaldelli-Maia, Giulio Castelpietra, Franz Castro, Ferrán Catalá-López, Christopher Cederroth, Ester Cerin, Joht Singh Chandan, Vijay Kumar Chattu, Sarika Chaturvedi, Nicolas Cherbuin, Ken Chin, Jesus Chirinos, Daniel Cho, Jee-Young Choi, Dinh-Toi Chu, Michael Chung, Flavia Cicuttini, Massimo Cirillo, Beniamino Cislighi, Barbara Corso, Paolo Angelo Cortesi, Vera M Costa, Ewerton Cousin, Richard Cowden, Christopher Crowe, Steven Cummins, Giovanni Damiani, Parnaz Daneshpajouhnejad, Aso Darwesh, Rajat Das Gupta, José Das Neves, Gail Davey, Claudio Davila-Cervantes, Edgar Denova-Gutierrez, Kebede Deribe, Nikolaos Dervenis, Rupak Desai, Govinda Dhungana, Mostafa Dianatinasab, Daniel Diaz, Martin Dichgans, Alireza Didarloo, Klara Dokova, Christiane Dolecek, Pratik Doshi, Tim Driscoll, Bruce Duncan, Arielle Eagan, Hedyeh Ebrahimi, David Edvardsson, Joshua Ehrlich, Maysaa El Sayed Zaki, Maha El Tantawi, Iffat Elbarazi, Islam Elgendy, Shaimaa El-Jaafary, Aisha Elsharkawy, Mohammad Hassan Emamian, Sharareh Eskandarieh, Andre Faro, Valery Feigin, Seyed-Mohammad Fereshtehnejad, Eduarda Fernandes, Pietro Ferrara, Irina Filip, Florian Fischer, James Fisher, Nataliya Foigt, Morenike Oluwatoyin Folayan, Masoud Foroutan, Richard Franklin, Marisa Freitas, Takeshi Fukumoto, Joao Furtado, Mohamed Gad, Abhay Gaidhane, Silvano Gallus, Feleke Gebremeskel, Leake Gebremeskel, Peter Gething, Farhad Ghamari, Ahmad Ghashghaee, Asadollah Gholamian, Simona Giampaoli, Paramjit Gill, Richard Gillum, Ibrahim Ginawi, Giorgia Giussani, Yordanos Gizachew, Myron Anthony Godinho, Mahaveer Golechha, Philimon Gona, Sameer Gopalani, Giuseppe Gorini, Bárbara Goulart, Ayman Grada, Felix Greaves, Rafael Guimaraes, Rahul Gupta, Rajeev Gupta, Juanita Haagsma, Nima Hafezi-Nejad, Brian Hall, Randah Hamadeh, Samer Hamidi, Graeme Hankey, Josep Maria Haro, Ahmed Hasaballah, Abdiwahab Hashi, Amr Hassan, Rasmus Havmoeller, Khezar Hayat, Claudiu Herteliu, Michael Hole, Ramesh Holla, Praveen Hoogar, H Dean Hosgood, Naznin Hossain , Mehdi Hosseinzadhe, Mihaela Hostiuc, Sorin Hostiuc, Mowafa Househ , Rabia Hussain, Ivo Iavicoli, Segun Emmanuel Ibitoye, Olayinka Ilesanmi, Irena Ilic, Milena Ilic, Usman Iqbal, Hiroyasu Iso, Chidozie Declan Iwu, Mihajlo Jakovljevic, Amir Jalali, Tahereh Javaheri, Ahamarshan Jayaraman Nagarajan, Ensiyeh Jenabi, Ravi Prakash Jha, Vivekanand Jha, Jost B Jonas, Mikk Jürisson, Ali Kabir, Neeti Kapoor, André Karch, Salah

Eddin Karimi, Ayele Semachew Kasa, Gbenga Kayode, Mohammad Khammarnia, Ejaz Khan, Gulfaraz Khan, Maseer Khan, Khaled Khatab, Mona Khater, Mahalaqua Nazli Khatib, Jagdish Khubchandani, Neda Kianipour, Christian Kieling, Yun Jin Kim, Adnan Kisa, Sezer Kisa, Niranjana Kissoon, Mika Kivimaki, Cameron Kneib, Hamidreza Komaki, Ai Koyanagi, Kewal Krishan, Shaji Ks, Manasi Kumar, Om Kurmi, Dian Kusuma, Carlo La Vecchia, Ben Lacey, Ratilal Laloo, Huong Lan Nguyen, Iván Landires, Savita Lasrado, Paolo Lauriola, Paul Lee, Matilde Leonardi, Janni Leung, Lee-Ling Lim, Stefan Listl, Yang Liu, Jaifred Christian Lopez, Stefan Lorkowski, Alton Lu, Alessandra Lugo, Raimundas Lunevicius, Azeem Majeed, Venkatesh Maled, Afshin Maleki, Reza Malekzadeh, Abdullah Mamun, Borhan Mansouri, Mohammad Ali Mansournia, Francisco Rogerlândio Martins-Melo, Seyedeh Zahra Masoumi, Benjamin Massenburg, Pallab K Maulik, Colm Mcalinden, John Mcgrath, Kala M Mehta, Addisu Melese, Walter Mendoza, Ritesh G Menezes, Endakachew Worku Mengesha, Atte Meretoja, Tuomo Meretoja, Tomislav Mestrovic, Irminda Maria Michalek, Edward Mills, Babak Moazen, Masoud Moghadaszadeh, Bahram Mohajer, Osama Mohamad, Dara Mohammad, Yousef Mohammad, Abdollah Mohammadian-Hafshejani, Shafiu Mohammed, Farnam Mohebi, Ali Mokdad, Mariam Molokhia, Lorenzo Monasta, Maziar Moradi-Lakeh, Rahmatollah Moradzadeh, Paula Moraga, Joana Morgado-Da-Costa, Shane Morrison, Abbas Mosapour, Jonathan Mosser, Seyyed Meysam Mousavi, Amin Mousavi Khaneghah, Ulrich Mueller, Kamarul Imran Musa, Mohsen Naghavi, Seyed Sina Naghibi Irvani, Behshad Naghshtabrizi, Mukhammad David Naimzada, Vinod C Nayak, Javad Nazari, Rawlance Ndejjo, Ionut Negoii, Ruxandra Irina Negoii, Georges Nguéfac-Tsague, Josephine Ngunjiri, Diep Nguyen, Yeshambel Nigatu, Rajan Nikbakhsh, Molly Nixon, Jean Jacques Noubiap, Christoph Nowak, Virginia Nunez-Samudio, Felix Ogbo, Onome Oghenetega, Emmanuel Okunga, Morteza Oladnabi, Andrew T Olagunju, Bolajoko Olusanya, Jacob Olusanya, Muktar Omer, Obinna Onwujekwe, Eyal Oren, Alberto Ortiz, Samuel Ostroff, Adrian Oțoiu, Nikita Otstavnov, Stanislav Otstavnov, Mayowa Owolabi, Mahesh P A, Jagdish Rao Padubidri, Smita Pakhale, Raffaele Palladino, Songhomitra Panda-Jonas, Mona Pathak, George Patton, Amy Peden, Veincent Christian Pepito, Alexandre Pereira, David Pereira, Jeevan Pereira, Norberto Perico, Julia Pescarini, Cristiano Piccinelli, Marina Pinheiro, Farhad Pishgar, Maarten Postma, Faheem Hyder Pottoo, Farshad Pourmalek, Sergio Prada, Elisabetta Pupillo, Hai Quang Pham, Zahiruddin Quazi Syed, Mohammad Rabiee, Navid Rabiee, Amir Radfar, Ata Rafiee, Alberto Raggi, Mohammad Hifz Ur Rahman, Muhammad Aziz Rahman, Chhabi Lal Ranabhat, Annemarei Ranta, Sowmya J Rao, Davide Rasella, Vahid Rashedi, Prateek Rastogi, David L Rawaf, Salman Rawaf, Lal Rawal, Reza Rawassizadeh, Vishnu Renjith, Andre Renzaho, Negar Rezaei, Nima Rezaei, Phoebe-Anne Rhinehart, Seyed Mohammed Riahi, Antonio Luiz Ribeiro, Daniel Cury Ribeiro, Jennifer Rickard, Leonardo Roeber, Michele Romoli, Luca Ronfani, Gholamreza Roshandel, Enrico Rubagotti, Susan Fred Rumisha, Godfrey Rwegerera, Seyedmohammad Saadatagah, Siamak Sabour, Perminder Sachdev, Basema Saddik, Masoumeh Sadeghi, Amirhossein Sahebkar, Biniyam Sahiledengle, Mohammad Ali Sahraian, Hosni Salem, Marwa Salem, Hamideh Salimzadeh, Joshua A Salomon, Hossein Samadi Kafil, Abdallah M Samy, Juan Sanabria, Damian Santomauro, Milena Santric-Milicevic, Arash Sarveazad, Davide Sattin, Silvia Schiavolin, Maria Inês Schmidt, Aletta Schutte, David C Schwebel, Falk Schwendicke, Sadaf Sepanlou, Saeed Shahabi, Mehran Shams-Beyranvand, Morteza Shamsizadeh, Sheikh Mohammed Shariful Islam, Maral Shayesteh Bonyan, Aziz Sheikh, Kenji Shibuya, Mika Shigematsu, Km Shivakumar Shivakumar Km, Mark Shrimme, Kerem Shuval, Inga Dora Sigfusdottir, Rannveig Sigurvinsdottir, Diego Augusto Santos Silva, João Pedro Silva, Biagio Simonetti, Ambrish Singh, Jasvinder Singh, Emma Smith, Amin Soheili, Joan B Soriano, Muluken Sorrie, Ireneous Soyiri, Chandrashekhar T Sreeramareddy, Kam Sripada, Simona Cătălina Ștefan, Dan J Stein, Mark Stokes, Saverio Stranges, Parminder Suchdev, Muawiyah Babale Sufiyan, Gerhard Sulo, Carolyn Swope, Rafael



Tabarés-Seisededos, Takahiro Tabuchi, Santosh Tadakamadla, Zarfshan Tahir, Animut Tagele Tamiru, Mohamad-Hani Temsah, Bhaskar Thakur, Nihal Thomas, Giang Thu Vu, Giang Thu Vu, Boikhutso Tlou, Marcello Tonelli, Roman Topor-Madry, Mathilde Touvier, Marcos Roberto Tovani-Palone, Ravensara S Travillian, Riaz Uddin, Irfan Ullah, Bhaskaran Unnikrishnan, Era Upadhyay, Marco Vacante, Regina Vaicekonyte, Sahel Valadan Tahbaz, Alessandro Valli, Tommi Vasankari, Yasser Vasseghian, Narayanaswamy Venketasubramanian, Simone Vidale, Francesco S Violante, Vasiliy Vlassov, Stein Emil Vollset, Theo Vos, Richard Wamai, Fang Wang, Yanzhong Wang, Yuan-Pang Wang, Robert Weintraub, Ronny Westerman, Taweewat Wiangkham, Nuwan Darshana Wickramasinghe, Ai-Min Wu, Hossein Yahyazadeh, Kazumasa Yamagishi, Sanni Yaya, Wahid Yazdi-Feyzabadi, Tomas Yeheyis, Naohiro Yonemoto, Seok-Jun Yoon, Theodore Younker, Yong Yu, Deniz Yuce, Syedsaoud Zaidi, Sojib Bin Zaman, Maryam Zamanian, Hadi Zarafshan, Mikhail Zastrozhin, Jianrong Zhang, Zhi-Jiang Zhang, Xiu-Ju Zhao, Yingxi Zhao, Cong Zhu, Arash Ziapour, and Stephen S Lim.

#### [Extracting, cleaning, or cataloging data; designing or coding figures and tables](#)

Christopher J L Murray, Kevin Ikuta, Megan Knight, Emilie Maddison, Fereshteh Mehri, Priya Parmar, Muming Tang, Alexandra Watson, Adrian Pana, Paul Briant, Kate Causey, Ilse Dippenaar, Matthew Doxey, William Gardner, Lydia Haile, Fablina Sharara, Jeffrey Stanaway, Fiona Charlson, Ana Maria Mantilla Herrera, Stephanie R M Zimsen, Mojtaba Bagherzadeh, Molly Nixon, Navid Rabiee, Mohammad Rabiee, Stein Emil Vollset, Biruk Wogayehu, Kanyin Ong, Jaimie Adelson, Chieh Han, Deepa Jahagirdar, Alireza Didarloo, Mikhail Zastrozhin, Olatunji Adetokunboh, Amir Almasi-Hashiani, Akshaya Srikanth Bhagavathula, Franz Castro, Giovanni Damiani, Takeshi Fukumoto, Leake Gebremeskel, Janni Leung, Nima Rezaei, Alize Ferrari, Nicholas J Kassebaum, Emma Nichols, Dillon Sylte, Sarah Wulf Hanson, Muktar Ahmed, Mowafa Househ, Mohammad Khammarnia, Borhan Mansouri, Masoud Moghadaszadeh, Ali Mokdad, Mohsen Naghavi, Phoebe-Anne Rhinehart, Yasser Vasseghian, Syedsaoud Zaidi, Mostafa Dianatinasab, Abhay Gaidhane, Mahalaqua Nazli Khatib, Alton Lu, Zahiruddin Quazi Syed, Chhabi Lal Ranabhat, Seyed Mohammed Riahi, Abdallah M Samy, Damian Santomauro, Seok-Jun Yoon, and Stephen S Lim.

#### [Managing the overall research enterprise](#)

Christopher J L Murray, Charlie Ashbaugh, Michael Brauer, Deborah Carvalho Malta, Kelly Compton, Lalit Dandona, Adrian Davis, Alize Ferrari, Peter Gething, Nicholas J Kassebaum, Yohannes Kinfu, Alan D Lopez, Rafael Lozano, Ali Mokdad, Erin Mullany, Mohsen Naghavi, Molly Nixon, George Patton, Puja Rao, Joshua A Salomon, Benn Sartorius, Roman Topor-Madry, Stein Emil Vollset, Theo Vos, Haidong Wang, Andrea Werdecker, Harvey Whiteford, and Stephen S Lim.
